# Supplementary material for: Copolymerization of 1,3-butadiene with phenyl/phenethyl substituted 1,3-butadienes: a direct strategy to access pendant phenyl functionalized polydienes
Source: Royal Society of Chemistry journal article supplement (doi:10.1039/d1ra02467a), 2021-01-01
Supplement: d1ra02467a1.pdf [file d1ra02467a1.pdf]

## Supporting Information

### **Copolymerization of 1,3-Butadiene with Phenyl/Phenethyl Substituted 1,3-Butadienes: A Direct Strategy to Access Pendant Phenyl Functionalized Polydienes**

Juan Lin<sup>a</sup>, Feng Wang<sup>b,c,\*</sup>, Chunyu Zhang<sup>b</sup>, Heng Liu<sup>b,\*</sup>, Dexin Li<sup>a</sup> and Xuequan Zhang<sup>b</sup>

<sup>a</sup> *Hainan Rubber Industry Group Co., Ltd., Fortune Plaza, 103. Binhai Avenue, Haikou City, Hainan Province, 571005, China;*

<sup>b</sup> *Key Laboratory of Rubber-Plastics, Ministry of Education/Shandong Provincial Key Laboratory of Rubber-plastics, Qingdao University of Science & Technology, Qingdao, 266042, China;*

<sup>c</sup> *School of Chemical Engineering, Changchun University of Technology, Changchun 130012, P. R. China;*

E-mail: [fengwang@qust.edu.cn](mailto:fengwang@qust.edu.cn); [hengliu@qust.edu.cn](mailto:hengliu@qust.edu.cn);

The microstructure of polybutadiene is calculated according to the previous report:

*Macromol. Chem. Phys.* **2013**, 214, 2172–2180.

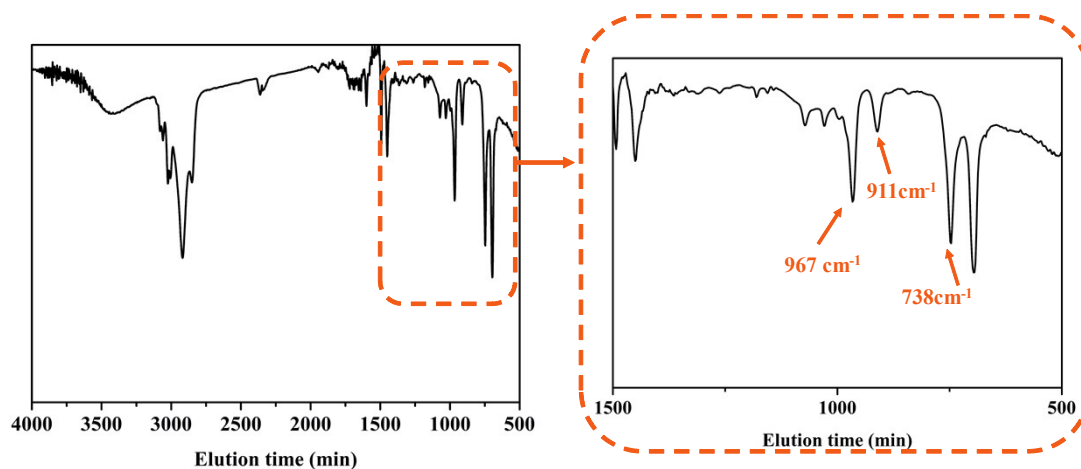

**Figure S1.** FTIR spectrum of sample run 8 (in Table 1), BD/PBD copolymer

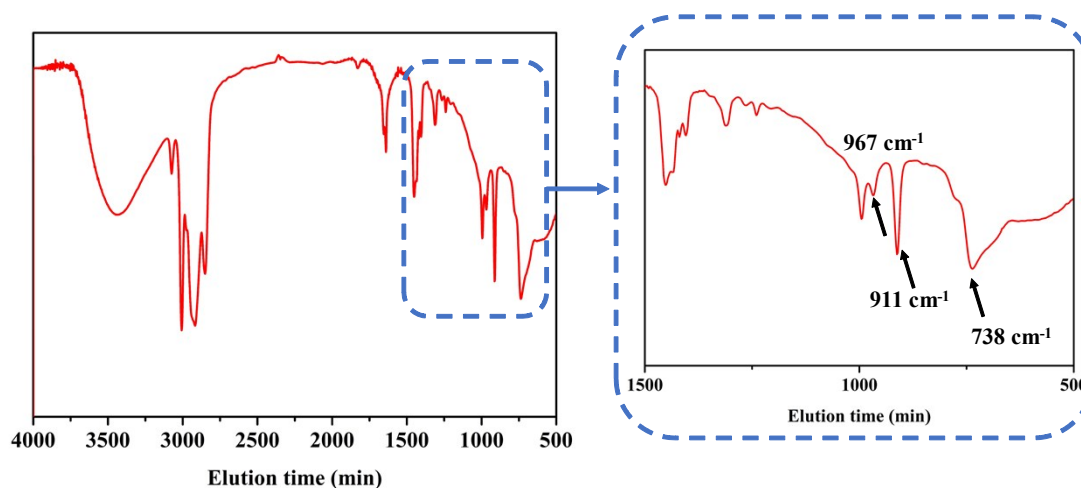

**Figure S2.** FTIR spectrum of sample run 11 (in Table 1), butadiene homopolymer

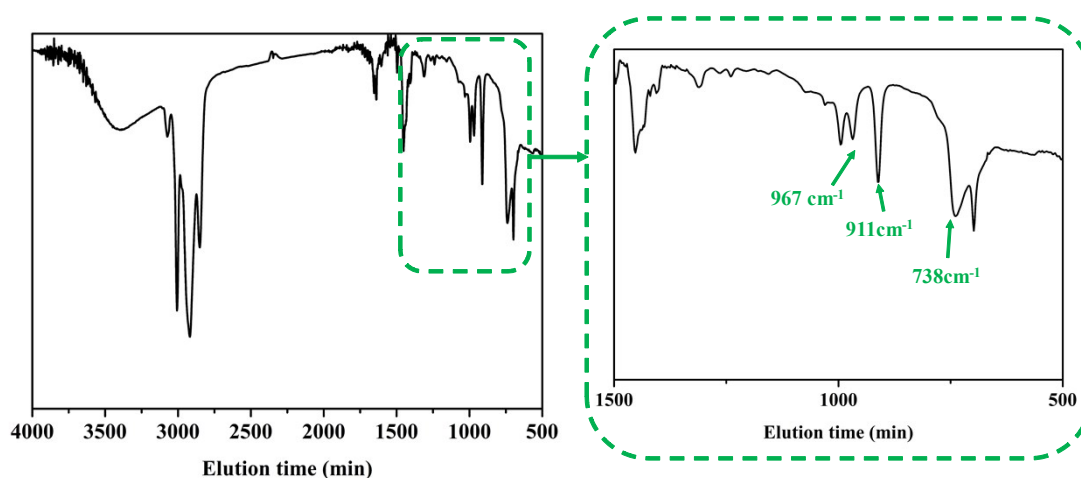

**Figure S3.** FTIR spectrum of sample run 18 (in Table 2), BD/PEBD copolymer

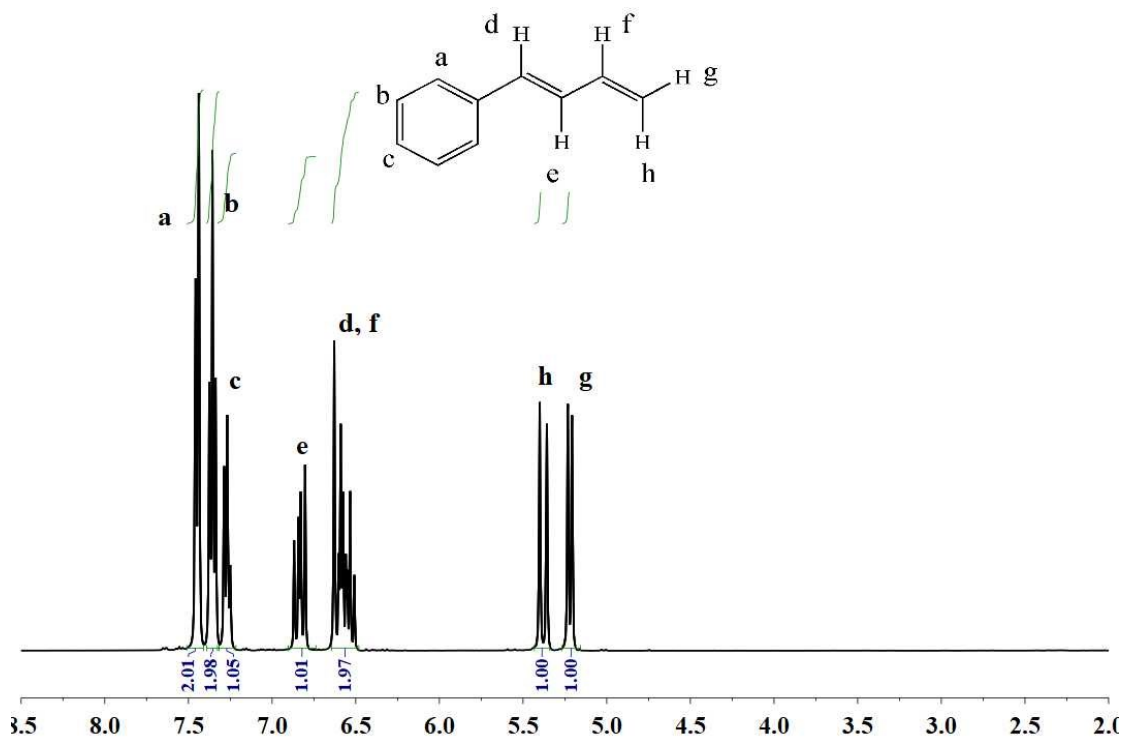

**Figure S4.** <sup>1</sup>H NMR spectrum of monomer 1-phenyl-1,3-butadiene (PBD) in CDCl<sub>3</sub>, 400M

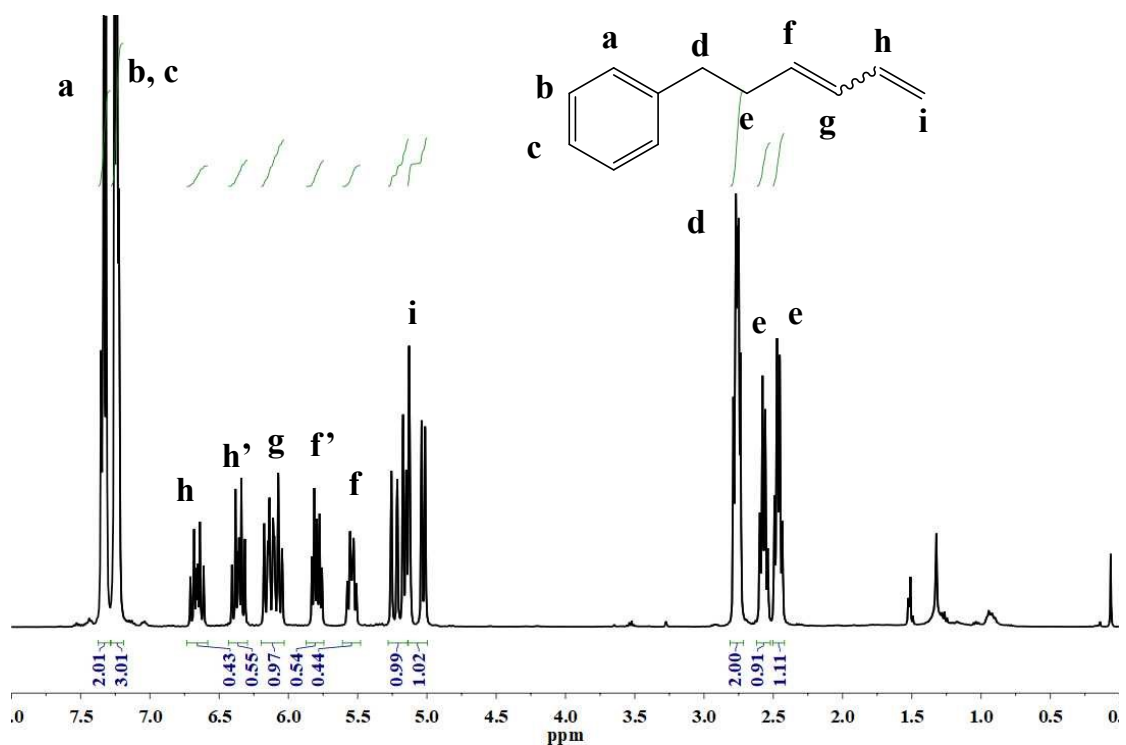

**Figure S5.** <sup>1</sup>H NMR spectrum of monomer 1-phenethyl-1,3-butadiene (PEBD) in CDCl<sub>3</sub>, 400M

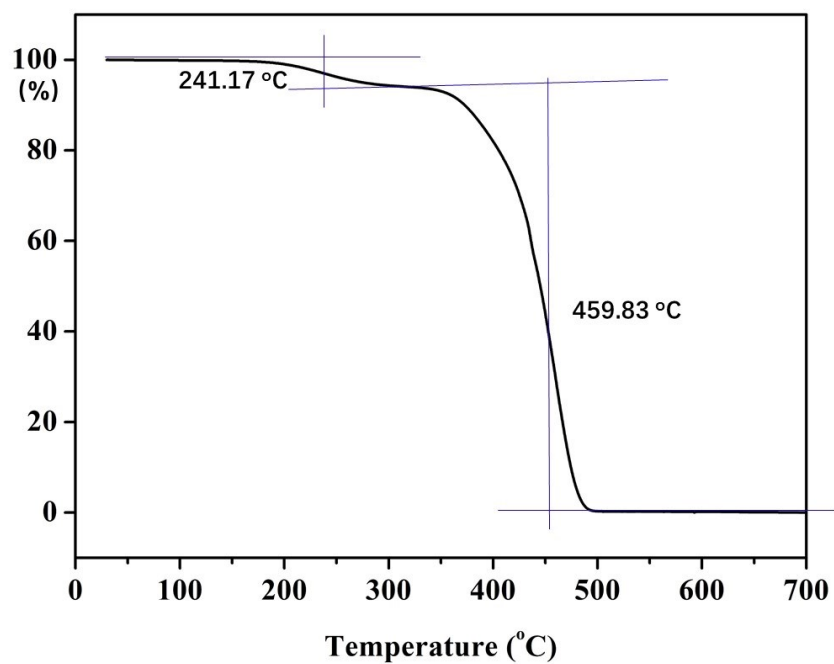

**Figure S6.** TGA curve for the sample of run 8, table 1.

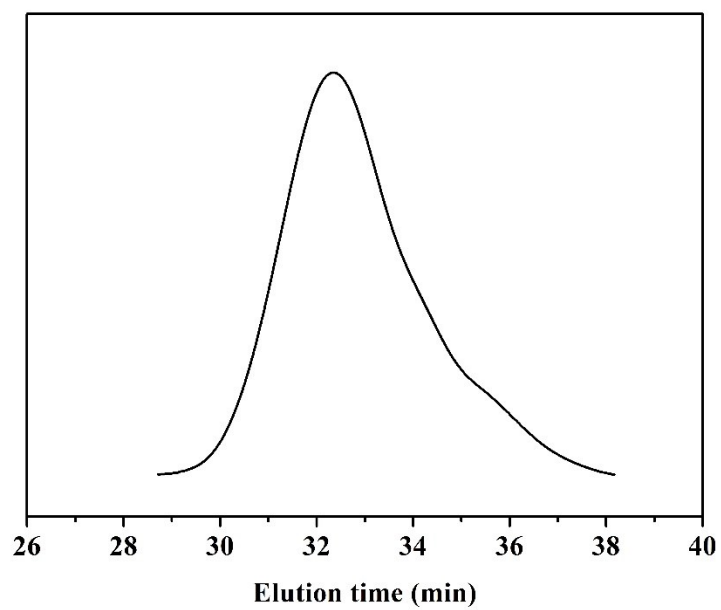

**Figure S7.** GPC profile of sample run 1(in table 1), BD/PBD copolymer

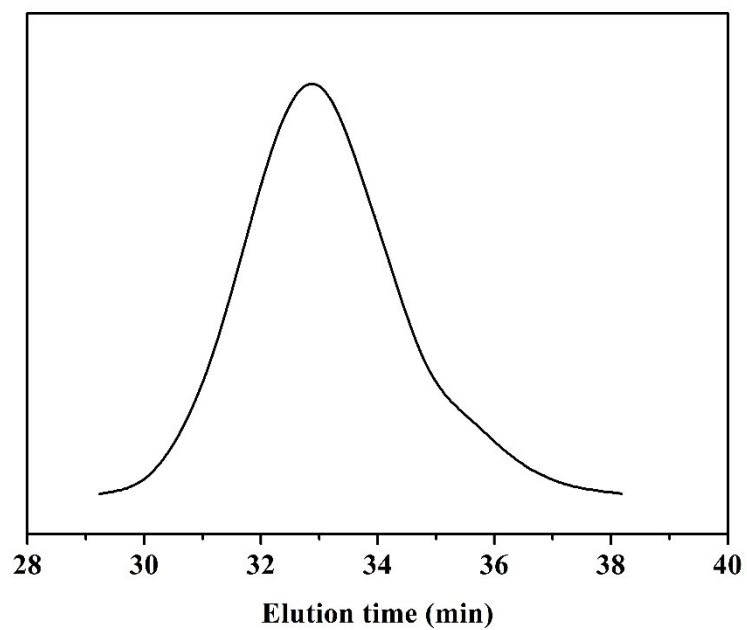

**Figure S8.** GPC profile of sample run 2 (in table 1), BD/PBD copolymer

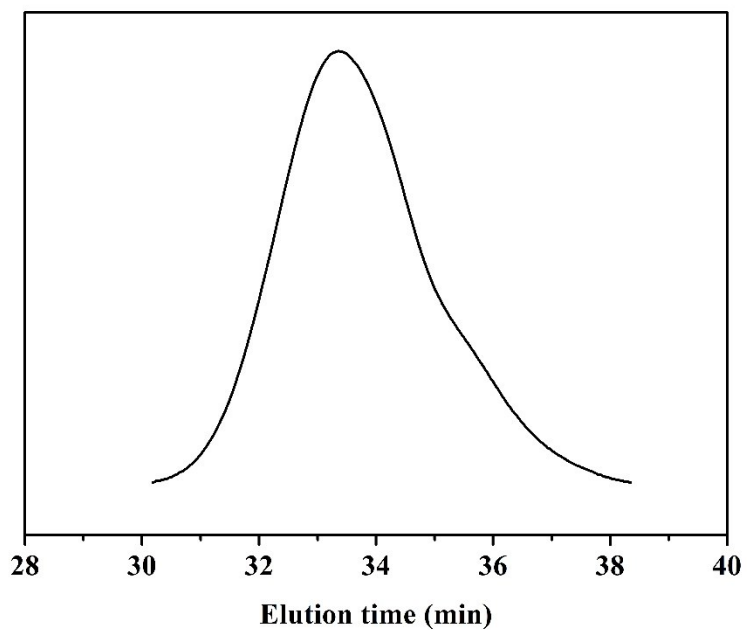

**Figure S9.** GPC profile of sample run 3 (in table 1), BD/PBD copolymer

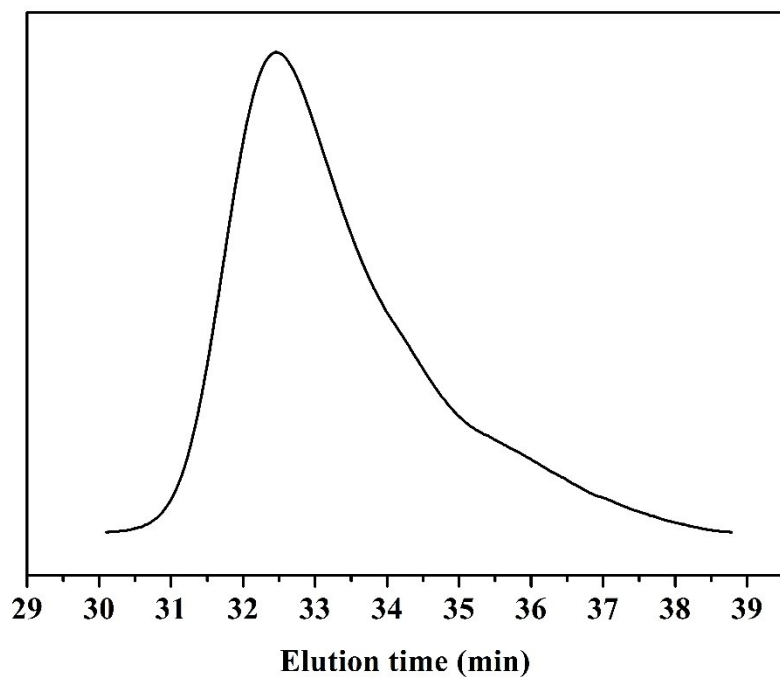

**Figure S10.** GPC profile of sample run 6 (in table 1), BD/PBD copolymer

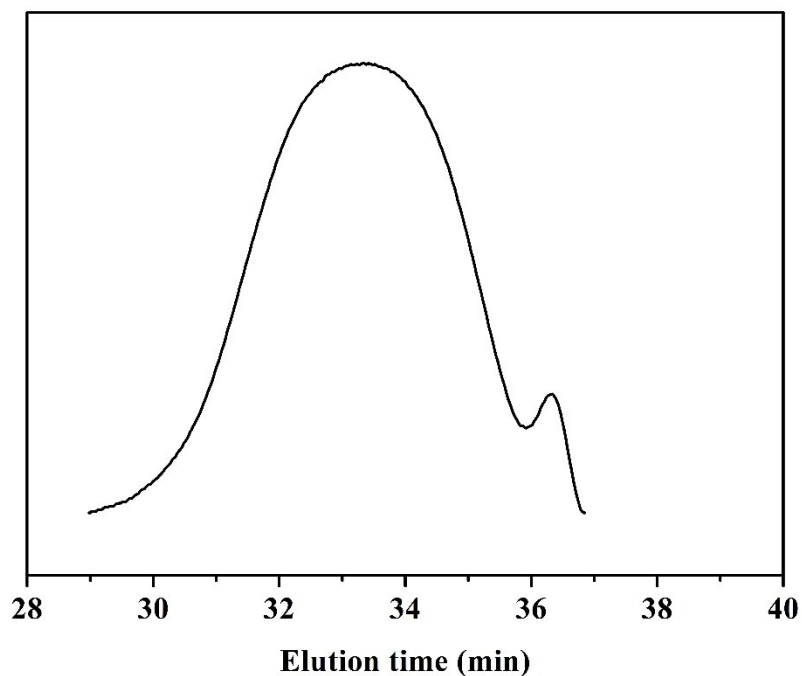

**Figure S11.** GPC profile of sample run 10 (in table 1), 1-phenyl-1,3-butadiene homopolymer

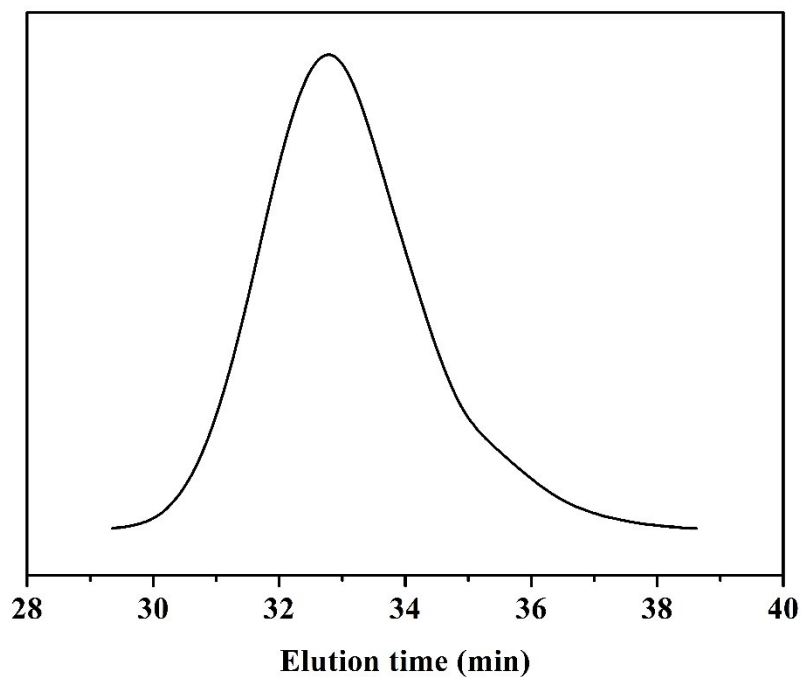

**Figure S12.** GPC profile of sample run 11 (in table 1), BD/PBD copolymer

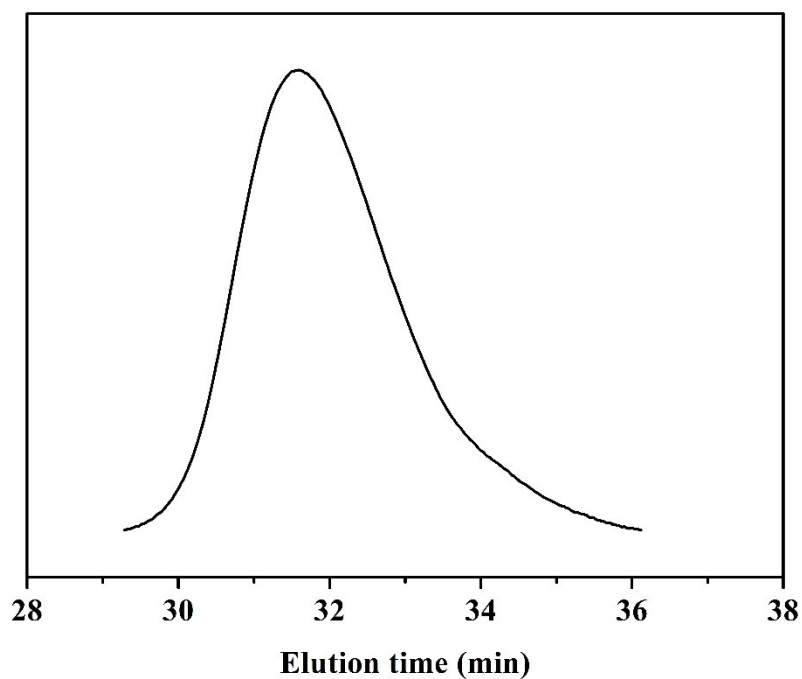

**Figure S13.** GPC profile of sample run 16 (in table 2), BD/PEBD copolymer

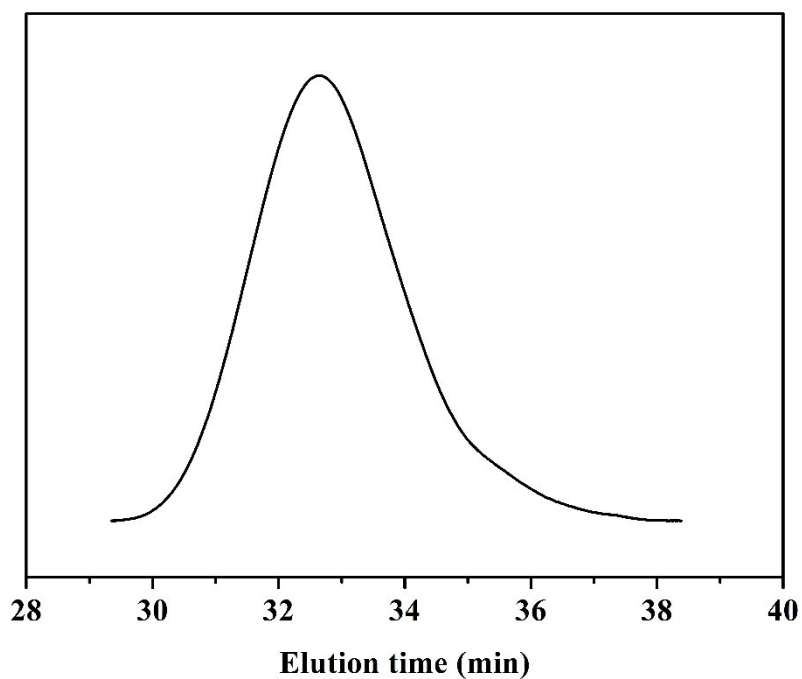

**Figure S14.** GPC profile of sample run 17 (in table 2), BD/PEBD copolymer

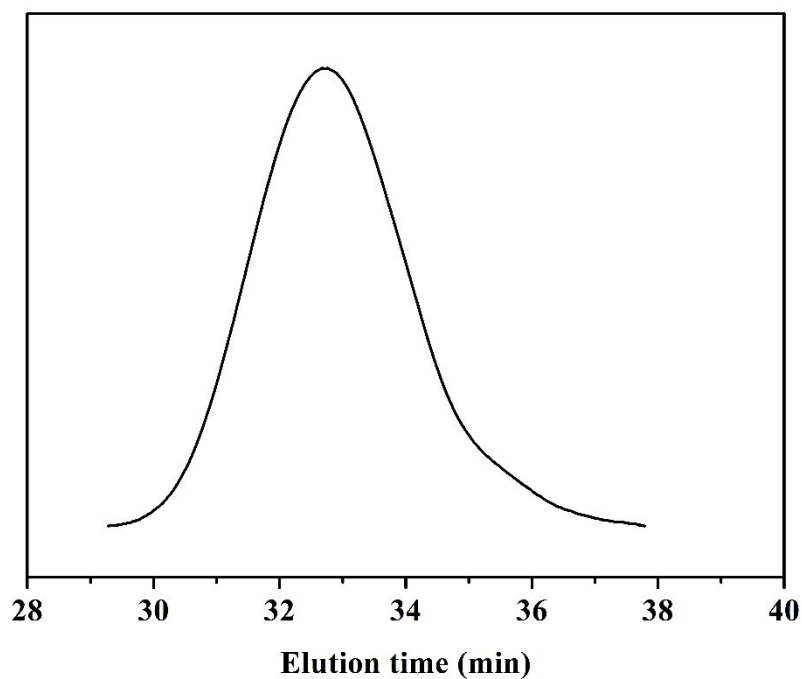

**Figure S15.** GPC profile of sample run 18 (in table 2), BD/PEBD copolymer



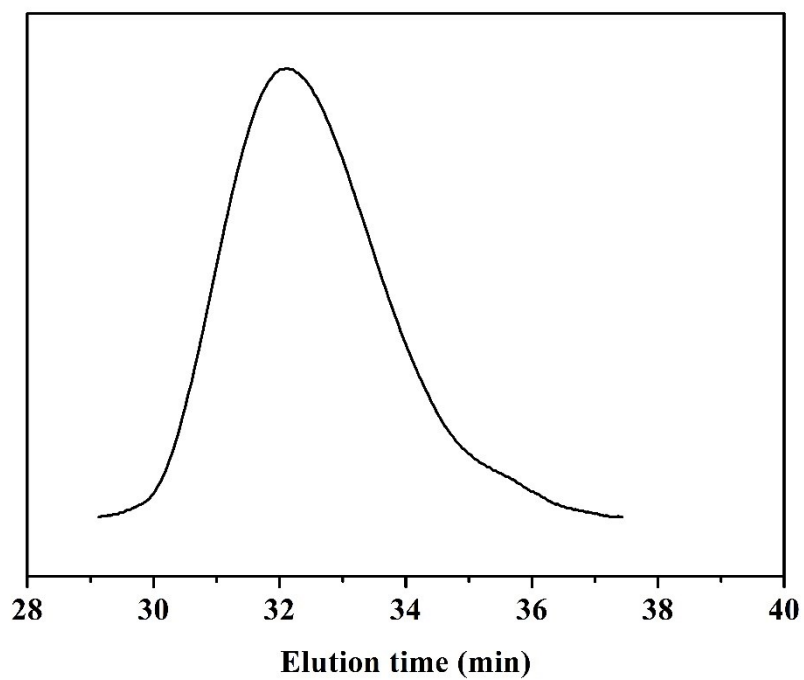

**Figure S16.** GPC profile of sample run 19 (in table 2), BD/PEBD copolymer

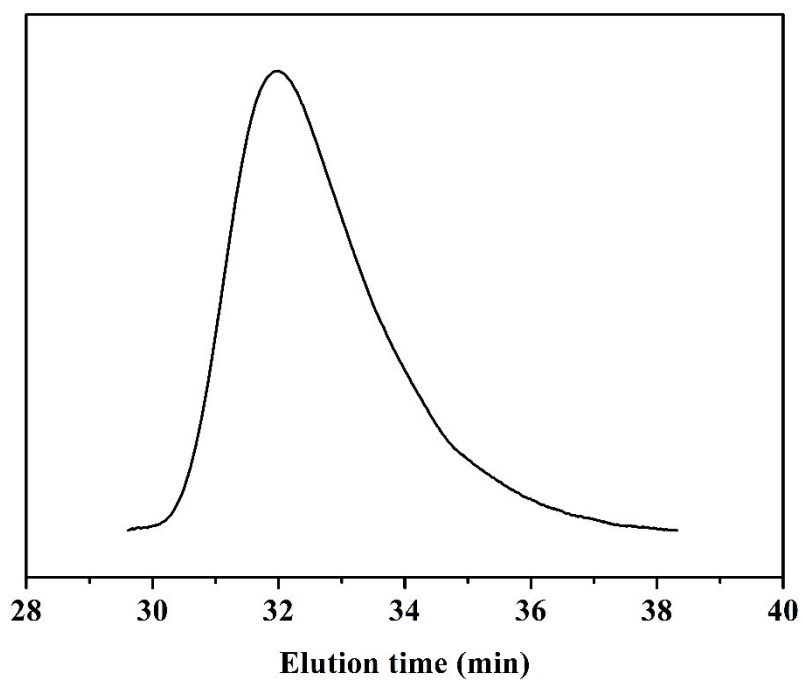

**Figure S17.** GPC profile of sample run 20 (in table 2), BD/PEBD copolymer

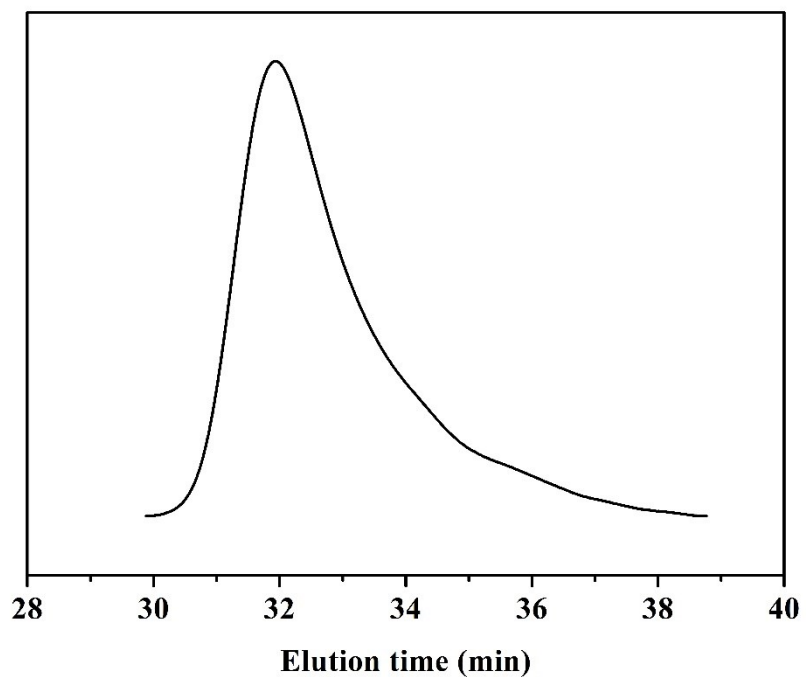

**Figure S18.** GPC profile of sample run 21 (in table 2), BD/PEBD copolymer

E

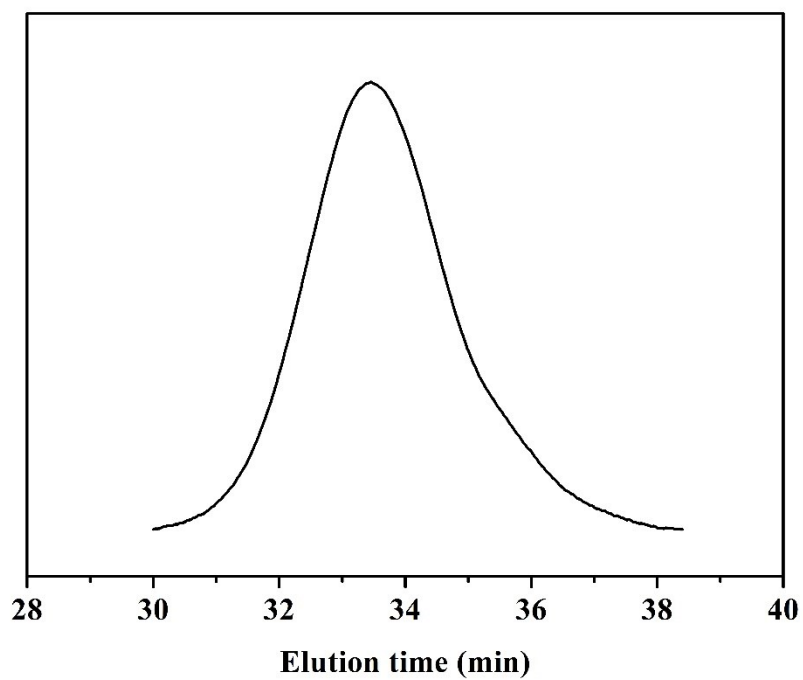

**Figure S19.** GPC profile of sample run 22 (in table 2), BD/PEBD copolymer

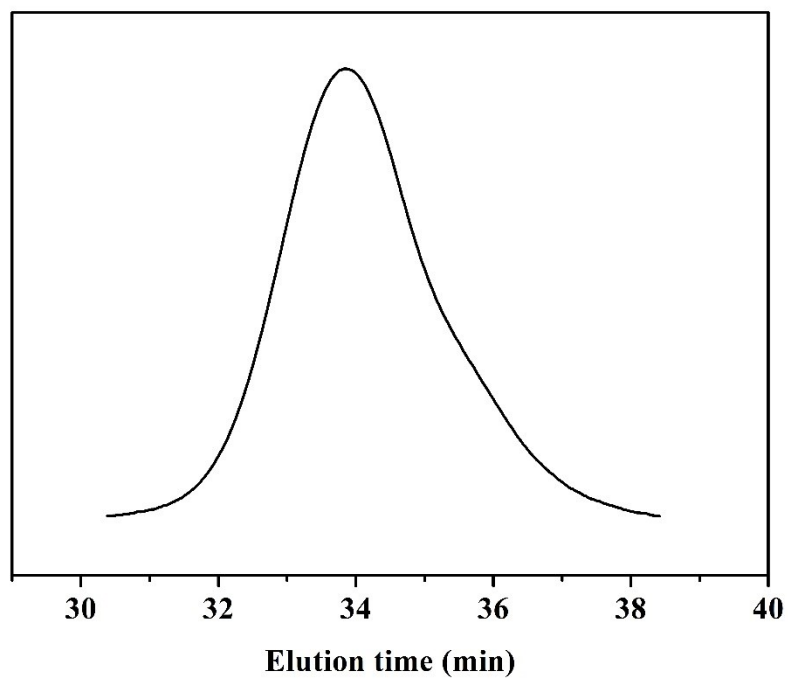

**Figure S20.** GPC profile of sample run 23 (in table 2), BD/PEBD copolymer

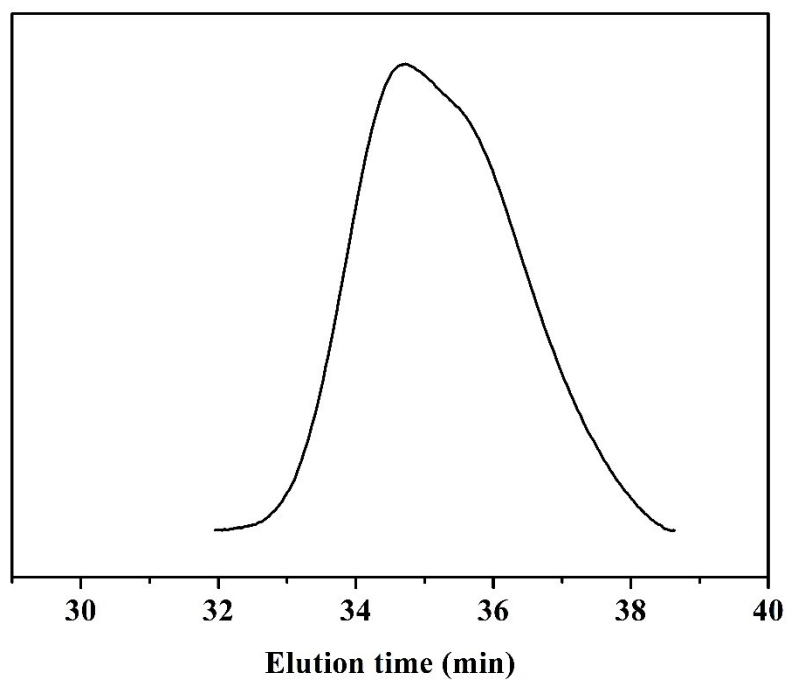

**Figure S21.** GPC profile of sample run 24 (in table 2), BD/PEBD copolymer
